# Supplementary material for: Evolution of Multicopper Oxidase Genes in Coprophilous and Non-Coprophilous Members of the Order Sordariales
Source: PubMed Central journal article supplement (PMC3129052; doi:10.2174/138920211795564368), 2011-04
Supplement: CG-12-95_SD1.pdf [file CG-12-95_SD1.pdf]

SUPPLEMENTARY MATERIAL

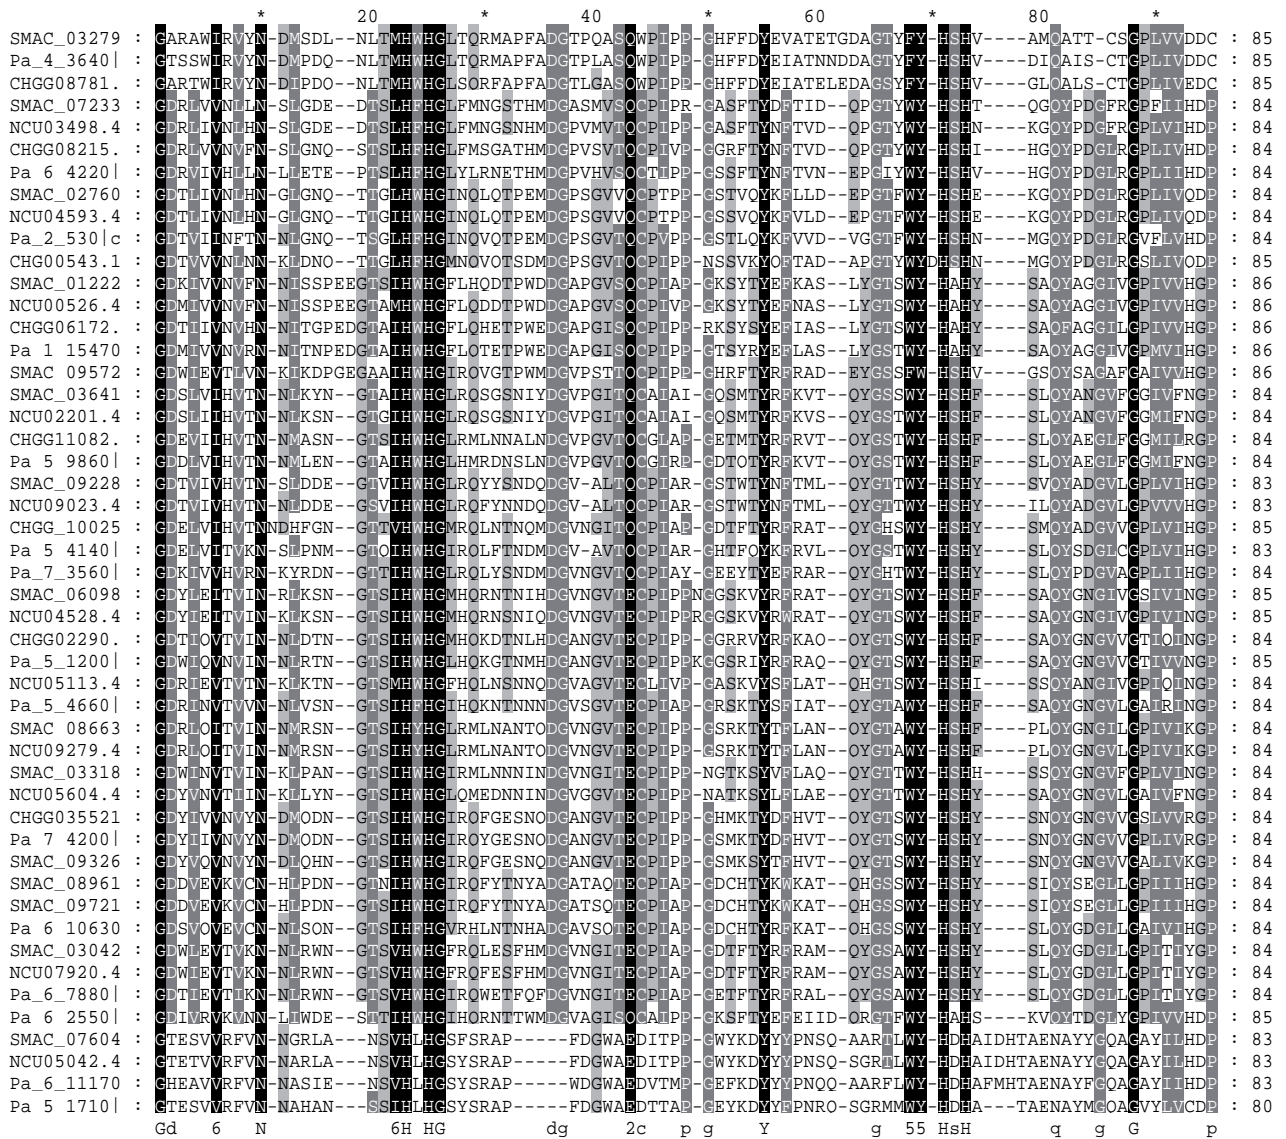

Fig. (S1). Clustal X Alignment of MCOs from *Neurospora crassa*, *Sordaria macrospora*, *Chaetomium globosum* and *Podospora anserina*. Alignment includes amino acid region of laccase L1 and L2 signature sequences.
